# Supplementary material for: YpeB dimerization may be required to stabilize SleB for effective germination of Bacillus anthracis spores
Source: PubMed Central journal article supplement (PMC6660665; doi:10.1186/s12866-019-1544-1), 2019-07-26
Supplement: 12866_2019_1544_MOESM1_ESM.pdf [file 12866_2019_1544_MOESM1_ESM.pdf]

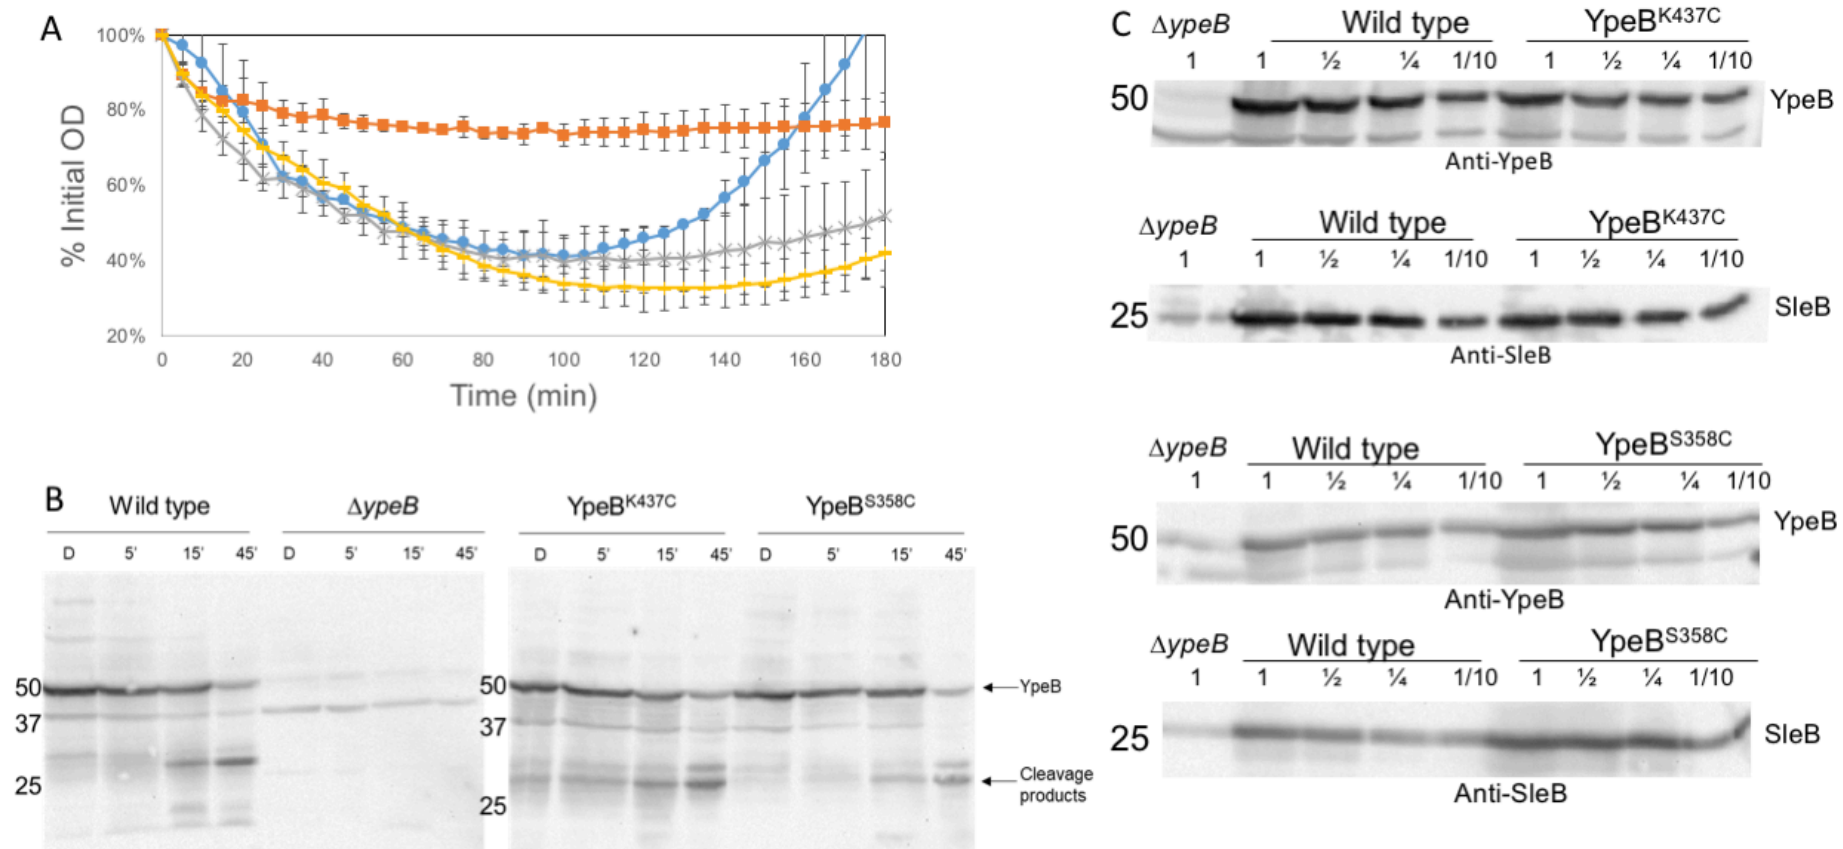

**Additional File 1. YpeB-cysteine mutant strain functional screens.** **A.** Germination rates of wild type ( $\bullet$ ),  $\Delta ypeB$  ( $\blacksquare$ ),  $YpeB^{K437C}$  ( $+$ ), and  $YpeB^{S358C}$  ( $\times$ ) spores were determined by monitoring  $OD_{600}$  change over time following addition of rich media. Spores with Cys-substituted YpeB proteins germinated similarly to the wild type but were delayed in outgrowth. **B.** Visualization of YpeB proteolytic processing during germination. Dormant spores were submitted to germination-inducing conditions, aliquots were taken at specified time points and flash frozen for later analysis via western blot. Cys-substituted YpeB proteins exhibited cleavage during germination similar to that of the wild type protein. **C.** 10 OD of dormant spores encoding YpeB-cysteine alleles and controls were lyophilized and mechanically broken. Serial dilutions of extracts were visualized via western blotting for both YpeB and SleB abundance. Cys-substituted YpeB proteins were present in spores at levels similar to that of the wild type protein and supported wild type levels of SleB accumulation.
